# Supplementary material for: Genomic Mapping of Splicing-Related Genes Identify Amplifications in LSM1, CLNS1A, and ILF2 in Luminal Breast Cancer
Source: MDPI journal article supplement (doi:10.3390/cancers13164118), 2021-08-16
Supplement: s1 [file s1]

**Supplementary Table S6.** Univariate and Multivariate COX regression analysis to assess the potential prognostic value of *CLNS1A*, *ILF2* and *LSM1* expression in Luminal breast cancer patients.

| RFS             | <i>CLNS1A</i>      | <i>ILF2</i>        | <i>LSM1</i>        | <i>CLNS1A+ILF2+LSM1</i> |
|-----------------|--------------------|--------------------|--------------------|-------------------------|
| Univariate      | 8.5E-07            | 7.3E-07            | 7.8E-07            | 1.1E-06                 |
| Multivariate:   |                    |                    |                    |                         |
| vs nodal status | 1.1E-02 vs 7.3E-07 | 3.2E-03 vs 7.5E-07 | 2.0E-05 vs 8.8E-07 | 1.05E-05 vs 6.7E-07     |
| vs grade        | 0.12 vs 7.6E-07    | 0.64 vs 1E-06      | 1.8E-02 vs 9.5E-07 | 0.04 vs 1E-06           |
| vs size         | 0.51 vs 4E-07      | 0.66 vs 5.9E-07    | 0.11 vs 4.9E-07    | 0.19 vs 4.7E-07         |
| vs age          | 0.04 vs 0.57       | 0.05 vs 0.76       | 2.6E-03 vs 0.61    | 6.3E-03 vs 0.7          |

| OS              | <i>CLNS1A</i>   | <i>ILF2</i>     | <i>LSM1</i>        | <i>CLNS1A+ILF2+LSM1</i> |
|-----------------|-----------------|-----------------|--------------------|-------------------------|
| Univariate      | 0.02            | 2.2E-03         | 6.3E-06            | 2.9E-06                 |
| Multivariate:   |                 |                 |                    |                         |
| vs nodal status | 0.14 vs 5.6E-05 | 0.04 vs 3.2E-05 | 0.011 vs 5.2E-05   | 2.2E-04 vs 5.3E-05      |
| vs grade        | 0.18 vs 3.5E-07 | 0.13 vs 4.4E-07 | 4.8E-04 vs 4.5E-07 | 2.9E-03 vs 4.4E-07      |
| vs size         | 0.08 vs 8.9E-07 | 0.21 vs 3.6E-07 | 0.07 vs 3.7E-07    | 9.8E-03 vs 5.9E-07      |
| vs age          | 0.06 vs 0.54    | 0.017 vs 0.44   | 7.6E-04 vs 0.54    | 8.6E-08 vs 0.39         |
